# Police Culture and Gender: Revisiting the ‘Cult of Masculinity’

Marisa Silvestri\*

**Abstract** The ‘cult of masculinity’ has received much attention as a persistent and negative feature of police culture, with its impacts repeatedly being drawn upon to make sense of women’s lack of progression and representation within policing. This article argues that such analyses remain locked into overly simplistic and reductionist accounts of how women and men experience gender within policing. In revisiting the ‘cult of masculinity’, this article assesses its utility as an explanatory tool in the 21st century. It explores alternative expressions of gender through an appreciation of the ways in which the concept of ‘time’ is embedded in the cultural set of understandings and belief systems about what it means to be a police officer and to do policing. In so doing, it enables a transgression of existing conceptualizations of the gendered nature of policing and of police culture.

## Introduction

The sheer volume of research concerned with documenting police culture serves as an important reminder of the ongoing significance of ‘culture’ as an enduring site within which to explore police identities. From a host of early works on police culture in the USA and UK (Banton, 1964; Skolnick, 1966; Westley, 1970; Cain, 1973), academic interest in developing understandings of police culture has preoccupied scholars for the last 50 years or so. Indeed the concept of police culture has become so routinely accepted that it now appears somewhat clichéd and as an ‘unquestioned orthodoxy’ (Sklansky, 2007, p. 20). More recent work in the field has, however, resulted in some fruitful and critical exchanges about the various dimensions, validity, and usefulness of the concept of police

culture (Loftus, 2009; Cockcroft, 2012; Paoline and Terrill, 2013; Bacon, 2014; Atkinson, 2016). The tenor of such critical conversation is encapsulated neatly by Bacon (2014, p. 103) when he notes that despite its explanatory power, extensive usage and influence, the concept of police culture remains somewhat ‘complicated, contested and, at times, contradictory’—the collection of papers in this special issue is testament enough to this. In this article, I want to draw out some of this complication, contestation, and contradiction to drive forward debates about gender and police culture. In doing so, I also want to respond to Cockcroft’s (2014, p. 11) suggestion that there has been a simultaneous ‘over-intellectualizing’ and ‘oversimplifying’ of the concept of police culture. In relation to gender, I

\*Associate Professor in Criminology, School of Social and Behavioural Sciences, Kingston University, Penrhyn Road Campus, Kingston upon Thames, Surrey KT1 2EE, UK. Email: m.silvestri@kingston.ac.uk

argue that there has been a significant oversimplification of police culture.

This oversimplification is perhaps best understood when situated against the persistent consensus within policing scholarship that confirms that policing is gendered at individual, structural, and cultural levels (Dick *et al.*, 2014; Silvestri, 2015). Despite the presence and participation of women within policing for well over a century now, policing continues to remain the preserve of (white) men and there is no evidence of a fully integrated police organization where women represent 50% of the officer workforce and enjoy an equivalent share of the full range of roles and ranks within the police hierarchy (Van Ewijk, 2012). Figures for England and Wales stand at 28%, though workforce data simultaneously indicates considerable variation in the number of women in policing across jurisdictions (BAWP, 2014) and across ranks, with women in senior ranks currently standing at 21% for Chief Inspector and above. In explaining this lack of gender representation, scholars have drawn significantly on the police culture literature in which ‘machismo’ and the ‘cult of masculinity’ feature heavily as the culprits. Here the ‘macho’ nature of policing and its cultural manifestations infused by ideas of danger, excitement and the need for ‘physicality’ are to blame for all of the ills perpetrated in the name of gender, both between officers and in their citizen interactions. The resounding power of such narratives can be found in, Loftus’s (2008, p. 756) recent revisiting of police culture in the 21st century. Here she provides a convincing and depressing account of the persistence of an ‘imperious white, heterosexist, male culture’. And while I do not wish to dispute this, far from it, I do wish to revisit the concepts of ‘machismo’ and the ‘cult of masculinity’ and emphasize the ways in which the uncritical acceptance of such terms has significantly stunted debate and analysis of the variation and complexity in gendered performance and identities within policing.

In order to locate alternative sites of gendered meanings within organizational culture, the article

draws on the work of organizational theorist Joan Acker (1992) whose concern lies with exposing the gendered substructure of organizational life—something I return to later in this piece. It is through such a lens that we can begin to identify some of the more complex and multiple meanings that come to define the ‘ideal’ worker within policing. Revisiting the cultural meanings of what it means to be a police officer has particular resonance given the ongoing police organization’s emphasis of bringing about cultural change through greater diversity within its ranks. Operating within a radically different landscape from the 1970s (when women were formally integrated into policing) the rhetoric of contemporary diversity agendas, through the calling of more women (and other underrepresented groups) into policing has taken on a transformative dimension in the race to bring about cultural reform.

What follows is an exploration of two key gendered principles and beliefs about doing policing. First, it reviews well-established arguments about the ‘cult of masculinity’ and its association with ‘physicality’ as an explanatory tool for understanding gender within policing. In so doing, the article challenges the idea of the ‘cult of masculinity’ and accounts of how gender is played out and experienced within policing. It also suggests that scholarship on gender and police culture remains fairly static and locked into overly simplistic and reductionist analyses of what this might actually mean and how this in turn might impact on women and men working in policing and on the communities they care for and control. It is not my intention here to diminish the importance or to displace the ‘cult of masculinity’ as an explanatory tool but rather to revisit it and assess its utility in the 21st century.

Secondly, in challenging conventional accounts of masculinity within policing, the article goes beyond traditional accounts of physicality and explores the way in which the concept of ‘time’ is a key constituent in the cultural set of understandings and belief systems about what it means to be a

police officer and to do policing. The concept of time here is understood as multifaceted and linked to the operation of gendered power. The ways in which time is used, valued and understood within policing (and organizations more broadly) is central to the maintenance of gender inequalities in public and private life. An appreciation of how the police organization defines and confers meaning to the concept of 'time' enables a transgression of existing conceptualizations of the discriminatory nature of police culture and offers a more nuanced account of where and how we might surface alternative gendered cultural understandings of policing and what it means to be a police officer. A focus on 'time' is particularly germane given the considerable ongoing police reforms to reconfiguring 'time' in the police career (through the provision and support of part time and flexible working and direct entry routes). This article suggests 'time' as a potentially transformative site within which to bring about significant cultural change. In advance of that and to enable a wider context within which to situate my argument, the article begins with a brief overview of the some of the criticism levelled at the scholarly body of work on police culture.

## An oversimplification of police culture?

Without wanting to rehearse well-established debates, it is worth reminding readers briefly here that much of the writing on police culture has already been critiqued for being overly simplistic in a number of ways. First, for its tendency to slip into cultural determinism, with police culture all too often treated synonymously as the cause and effect of police misbehaviour. Here we have the unfortunate syllogistic reading of police culture as universally pejorative. Secondly, work on police culture has been heavily critiqued for its lack of appreciation of the differences in culture that might exist. Readers will be familiar with Robert Reiner's (1992) seminal argument that police

culture should not be read as 'monolithic'. And finally, the critique that police culture has been portrayed as 'static' and unwavering in its resistance to change and ultimately to blame for the lack of success in police reform agendas. Responding to such criticism, considerable progress has been made towards 'intellectualising' the study of police culture. Contributions by Chan (1997), Waddington (1999), and Paoline (2003) have certainly opened up a space in which a more 'appreciative' reading of police culture might be possible. The multiplicity and variation in across police ranks, role, and specialization has also been increasingly explored by researchers looking to expand the idea of the existence of culture(s) within policing (Cain, 1973; Punch, 1985; Reuss-Ianni and Ianni, 1983; Hobbs, 1988; Young, 1991; McCarthy, 2012). And, the capacity of police culture to undergo change and transformation has been further emphasized by various commentators (Chan, 1997; Loftus, 2009, 2010; McCarthy, 2012; Silvestri *et al.*, 2013). While Chan (1997, p. 73) reminds us of the power of individual officers to be 'active' in 'developing, reinforcing, resisting, and transforming cultural knowledge, Loftus (2010) further emphasizes the potential power of wider reform agendas to bring about change, citing community policing, the advent of new public management, changes to recruitment demographics, and the ongoing politicization of the police as providing possible opportunities for changes/dilutions in culture. For a comprehensive review of these criticisms and developments in police culture scholarship, see Cockcroft (2012).

Studies on gender and policing more particularly have also been subject to considerable oversimplification. From the very outset it is important to stress that much of the work on gender has focused on women, little is actually known about men's experiences of policing through a gendered lens as men or through a theoretical lens of masculinity (though Barrie and Broomhall's (2012) excellent edited collection provides an illuminating insight of the histories of men and masculinities in

policing). And with the growth in diversity discourses, studies on women and policing have become increasingly focused on counting how many women have been recruited, documenting where they are located and assessing their contributions to policing in relation to their male counterparts. While I have argued elsewhere of the futility of focussing on the numeric and on women's specific contribution to policing, its significance to debates about culture lie in relation to ideas about the effects of a 'critical mass' on organizational change. Designated by organizational theorists as a point at which there is an opportunity to shift dominant meanings and cultural understandings within organizational settings, the theory of critical mass suggests that changes to culture are most likely to be enabled when minority groups achieve a presence of around 35% (see Childs and Krook, 2008 for a good review of this concept). I will return to the damaging effects of such standpoints later but for now, suffice to say that such a relentless focus on numbers has been at the expense of a more meaningful exploration of the various gendered cultural formations within policing and how these might hinder women's representation and progression. In short, I argue that in its current form, the police rhetoric on diversity represents an oversimplification of what is possible within policing together with a lack of awareness of how this rhetoric is experienced and received within policing. It does not fully confront the realities of women's cultural experiences within policing and serves as a distraction to more fundamental debates about the realities of a gendered police culture that is simultaneously inclusive and exclusive, enabling and disabling, and progressive and regressive.

### **Doing gender—exploring the police substructure**

There is much to be gained from studying the work of organizational theorists when exploring

organizational culture. Acker's (1990, 1992) seminal work on gendered organizations remains an important starting point for exploring hierarchical organizations. In her work, she argues that organizations provide forums within which cultural images of gender, beliefs, symbols, accepted routines, and ways of working are produced and then reproduced by individuals and organizational structures. Gender in this context is defined as a contextually situated process rather than as an individual characteristic. Instead of a characteristic that people have, gender is something that individuals do with their behaviour and organizations do through the gendering processes and structures. In this way, she argues that 'meaning and identity are patterned through and in terms of a distinction between male and female, feminine and masculine' (Acker, 1992, p. 146). It is through the construction of such 'gendered personas' based on the creation of difference within institutional settings that organizations are able to routinely perform gender. Inherent in this is the idea that concepts of masculinity and femininity are not biologically determined or reflective of natural differences but that they are socially learned and reinforced (West and Zimmerman, 1987). Doing gender then, involves a 'complex of perceptual, interactional, micro political activities that cast particular pursuits as expressions of manly and womanly "natures"' (West and Fenstermaker, 1995, p. 9). The concept of the gendered 'ideal' worker transcends the police service and can be located in a range of work settings, see work by Hale (2011) on the military; Ainsworth *et al.* (2014) on firefighting; Johnston and Hodge (2014) on private security work, and Ness (2012) on the construction industry. In the case of policing, the casting of police work as an expression of 'manliness' has been central to the project of policing and to the construction and identity of the 'ideal' police worker—I return to this later in the article.

Embedded in Acker's theory is the notion that while organizations present themselves as gender neutral, where organizational roles and

management hierarchies assume a ‘universal and disembodied’ worker, the reality is the far from this. If we adopt a gendered reading of organizations, it becomes clear that organizations are not gender neutral but rather are arenas in which gender is present and purposeful but obscured through gender-neutral discourses which conceal the embodied elements of work. If we are to surface the embodied elements of work and the reproduction of gendered identities, we need to consider Acker’s further ideas about the ‘gendered substructure’ within organizations—that is, the social practices that are generally understood to constitute an organization rest on certain gendered processes and assumptions. In defining this substructure, Acker (1992, p. 255) argues that:

The gendered substructure lies in the spatial and temporal arrangements of work, in the rules prescribing workplace behaviour and in the relations linking work places to living places. These practices and relations, encoded in arrangements and rules, are supported by assumptions that work is separate from the rest of life and that it has the first claim on the worker.

In this article, I focus on some of the temporal arrangements of police work that form part of the powerful narrative in the construction of a police identity. As a hierarchical and bureaucratic organization, the police service lends itself well to such theoretical insight. In line with Acker’s work, this article argues that the police service and its organizational structures are not gender neutral. Rather, the police organization is premised on an ‘ideal worker’. This ideal worker is male—it is men’s bodies, sexuality, and relationships to life beyond work that are subsumed in the image of the ‘ideal’ police worker. Moreover, the imagery of men and masculinity permeate organizational processes and cultural beliefs, marginalizing women and ultimately contributing to the maintenance of gender difference and segregation within organizational

life. To better understand the presence and persistence of gender inequalities in policing then, an appreciation of the ways in which police work and the police career is patterned through beliefs about the ‘ideal’ worker is fundamental.

### **The ‘cult of masculinity’—doing gender through ‘physicality’**

Good old-fashioned machismo has been at the heart of debates about policing, police culture, the exclusion of women from policing, and the failure of police reform agendas. Commentaries on the ‘macho’ state of policing can be found throughout the decades. In 1978, Manning described police culture as ‘Essentially a masculine culture with an emphasis on virility, toughness, masculinity, and masculine interests such as sexual triumphs, sports, outdoor life, and so forth’ (Manning, 1978, p. 249). And machismo was to become a key motif in Reiner’s (1992) core characteristics of police culture. In deciphering the ‘cult of masculinity’ Fielding’s (1994, p. 47) outlines the stereotypical values of such masculinity, suggesting that it could be read as an almost pure form of ‘hegemonic masculinity’, composed of:

- (i) aggressive, physical action;
- (ii) a strong sense of competitiveness and preoccupation with the imagery of conflict;
- (iii) an exaggerated heterosexual orientation, often articulated in terms of misogynistic and patriarchal attitudes to women;
- (iv) the operation of rigid in-group/out-group distinctions whose consequences are strongly exclusionary in the case of out-groups and strongly assertive of loyalty and affinity in the case of in-groups

Subsequent writers have gone on to emphasize the gendered and sexualized nature of police culture with its attendant association with the cult of

masculinity described above (Heidensohn, 1992; Westmarland, 2001; Brown, 1997; Rabe-Hemp, 2009; Morash and Haarr, 2012). With its emphasis on physicality, the ‘crime fighting’ model of policing holds much in line with such a characterization. With physicality and a capacity for force, deemed as ‘natural’ for men, police work becomes a means whereby men differentiate masculinity from femininity and in turn policing becomes the so-called ‘natural’ preserve of men, as Heidensohn (1992, p. 73) reminds us ‘[A]n elision which is frequently made [is that] *coercion* requires *force* which implies *physique* and hence policing by *men*’. I remind readers here of the importance that Acker (1992) attaches to the way in which gendered organizational cultures operate—that is, organizations actively provide opportunities that facilitate, perpetuate, and sustain the construction of gender differences and it is through such patterning of difference that we come to understand cultural meanings and identities. Through the construction of such differentiation between women and men, it is easy to understand how women become ‘outsiders’ and deemed ‘deficient’ and ‘unsuited’ for the job of policing.

A policewoman’s perceived lack of physical presence, tough physique and, above all, masculinity has long been used as a rational and legitimate reason for their exclusion. Assertions that the work of policing is too dangerous for women or that the situations they may encounter in their daily work are too physically demanding for them to handle contribute to a discourse in which the hegemonic model of masculinity is one in which to be masculine is to be strong and physically aggressive (Connell, 1987). The lack of physical strength and the ensuing problems in violent situations has remained a consistent justification offered by policemen for women’s continued differential deployment and their negative view of policewomen over the past century (Heidensohn, 1994). Women’s experiences of exclusion on such grounds can be found in the narratives of early policewomen. At the turn of the 20th century,

women worked in separate policewomen’s departments, with a focus on providing ‘specialist’ work with vulnerable women and children in need of rescue from ‘moral’ danger—the task of ‘fighting crime’ or ‘policing men’ was designated an all-male preserve (Schulz, 1995; Segrave, 1995; Jackson, 2006; Brown and Heidensohn, 2007).

Faced with the reality that women are now fully integrated into policing and can be found working across a range of police roles, including those roles that reflect forms of hyper masculinity, such as firearms, it might be assumed that such justifications for their exclusion based on physicality no longer hold sway or validity in the 21st century. Sadly, the traditional ‘cult of masculinity’ within policing remains intact. Bethan Loftus’s (2008) work on police culture provides an unflinching account of the resounding power of gender within policing. More recent research by Atkinson (2016, p. 13) on Scottish policing further confirms the presence of the ‘cult of masculinity’ within police culture. Citing the ‘body’ as a key site of cultural work in reproducing a gender regime in police intelligence work, he argues that female bodies are frequently sexualized by police officers and discriminated against and the ‘hegemonic masculinity apparent in police culture is privileged’. Providing new insights into the gendered nature of police culture through an exploration of the interactions between sworn police officers and civilian intelligence workers, Atkinson evidences the ongoing negative and discriminatory effects for these women, noting that patriarchal dispositions within policing remain, with the intelligence analyst being subject to a police culture which defines such work as ‘administrative work’ and not the task of ‘proper’ policing. In this way, Atkinson argues that the ‘gender regime’ (Connell, 2006) is upheld and sustained—with intelligence work constructed as ‘feminine’ and ‘women’s work’. Moreover, findings from his study suggest the infantilization of such roles with intelligence analysts described by police officers to be ‘dependent, ignorant, immature, powerless and un-knowing’ (Atkinson, 2016,

p. 9). Through the construction of such difference, women become subordinated and ultimately 'accept a patriarchal bargain; becoming passive, inactive, dependent and child-like, and thus marginalised to the periphery of police work' (Atkinson, 2016, p. 14).

While the persistence of the 'cult of masculinity' and its association with men doing physicality remains a dominant narrative in policewomen's experiences across the world (Rabe-Hemp, 2009; Prenzler and Sinclair, 2013; Natarajan, 2008), work by Terpstra and Schapp (2013) in the Netherlands presents an interesting deviation. While many of the officers in their study reported that their image of police work was closely related to physical strength and courage—that is, the 'crime fighter' model, only a minority of officers thought that women were not suitable for this work leading them to conclude that:

Compared to the standard model of police culture, many Dutch police officers are not conservative and generally do not share the idea (any longer) that police work should be only a male affair. (Terpstra and Schapp, 2013, p. 70)

While such findings might be drawn upon to suggest evidence of an improved and progressive landscape for women police—in terms of their acceptance as crime fighters—the importance of such findings add further fuel to the suggestion that machismo is alive and kicking. The idea that both men and women subscribe to the crime fighting role within policing is a regressive step and confirms broader narratives about the value of police work in the 21st century. Despite the opportunities presented to radically reconfigure the cultural conceptualizations of being a police officer through a greater emphasis on community work, care for victims and better investigative skills, the police orientation to action, danger, and excitement does not appear to be waning. Research continues to demonstrate that tackling domestic abuse and neighbourhood disputes remains outside of officers'

perceived remit and at the lower end of officers' 'sense of crime hierarchy' (Loftus, 2009, p. 92). That said, it would be unfair here to emphasize police women and men's active complicity here without a fuller appreciation of the broader perpetuation and growing state support for a 'crime fighting' mentality within policing. Critical reflections on contemporary policing by Loader (2014) emphasize the ways in which government reform agendas are strongly underpinned by a motivation to 'liberate' the police to undertake the role of 'crime fighter'. In short, the cultural construction of the 'ideal' police worker continues to be routinely achieved through doing physicality. And, while this is an important facet of police culture, this is only one gendered manifestation of police culture. As women begin to progress through police ranks, such cultural constructions of police masculinity maintain less utility and resonance. Here, I want to turn my attention to the importance of 'time' as a fundamental but underexplored cultural trait of policing. I remind readers of Acker's notion of the gendered substructure and its emphasis on the 'temporal' arrangements of work in prescribing the 'ideal' worker.

## Doing gender through 'time'

In the same way that 'physicality' has been drawn upon to explain women's unsuitability to the work of policing, adopting a temporal lens enables an exploration of alternative cultural prescriptions of the 'ideal' police worker—this has particular resonance for those seeking career progression and a place in police leadership. The concept of 'time' here is explored in relation to the police career model and in its everyday expressions. Strongly structured and linear in style, officers for the most part, begin their careers at the bottom and work their way up a series of structured ranks. That said, attempts to reconfigure this model can be seen in the recent changes enabling alternative career routes through 'fast track' career options

and direct entry to the rank of Inspector and Superintendent. These are important changes and may well impact upon the way in which the time is performed and perceived within policing. It is, however, somewhat premature to assess the impacts of such change, so for now it remains the case that the police career is best described as a tightly structured model. In his study of chief constables, Reiner (1991) emphasized the considerable time and endurance required by officers in their journey to achieve leadership. While achieving a place in the senior ranks is a major feat in and of itself for all officers (male and female), the police career ladder is experienced in different and more acute ways by women. I have argued elsewhere that it is not simply the protracted length of time that characterizes the police career that contributes to women's lack of progression within policing but that the management of everyday time that is central to fulfilling the appropriate cultural requirements of being a police leader. The cultural prescriptions of police leadership are enmeshed within a 'full time and uninterrupted' career profile. And while there is nothing official to prohibit police leaders from having worked part-time or taking a career break on their journey to the top, unofficial narratives suggest the cultural markers of the 'ideal' police leader—credibility, commitment and competency—are best achieved through the possession of a 'full time and uninterrupted' career status (Silvestri, 2006). Undertaking part-time or flexible working practice within policing goes against the cultural ideals of the ideal police worker, with part-time officers often perceived to be 'less professional and less committed'—as workers who enjoy 'privileges' rather than 'entitlements'. In 2013, a survey conducted by the Independent Police Commission revealed that 18% of survey respondents indicated flexible working is either discouraged or not tolerated in their forces, while only 7% said flexible working is positively encouraged. Accounts describe a culture in which part-time and flexible workers are perceived as 'a burden', 'too difficult to manage', as 'partially committed' or

conflated within the 'sick, lazy and lame' categorization. The gendered implications are clear—while all officers (both male and female) experience the pressure to accumulate and demonstrate credibility, commitment and competence and to do time as the police career prescribes, for the most, it remains the case that men have more access to the resource of time and thus are more likely to be able to work full-time and without interruption. Research indicates a strong belief among women in policing that engaging in such arrangements adversely affects their promotion and career prospects. In practice, part-time work tends to be seen as deviation from the full-time norm of policing, as a 'concession' to women who have family responsibilities. This, in turn, affects the promotion aspirations and opportunities of policewomen, representing an 'irresolvable conflict' between balancing family commitments and a career in policing and a major barrier for women looking to progress to police leadership ranks (Silvestri, 2006).

Alongside the police career, the gendered importance of time can be seen in its everyday expressions. Organizational theorists have long recognized the ability to give and do 'time' as a hugely desirable attribute for those seeking to climb the career ladder—this has taken on even greater significance in an increasingly competitive climate in which organizations are undergoing radical structural reform and under conditions of austerity in which workers are expected to do more with less. Such a reality certainly resonates with contemporary policing. Research on police inspectors by Turnball and Wass (2015, p. 516) suggest the normalization of 'extreme/over' work within policing where officers feel compelled to work excessive hours, with a 'regular and expected demand to work "beyond the call of duty"'. With all police officers required to work as directed (that is, according to the 'exigencies of duty'), the tendency towards 'extreme/over' work becomes a key expectation and feature of being a police leader. With Superintendents working 50–60 h per week, and more than one in ten working 60–70 h per week



(Donaldson-Feilder and Tharani, 2011) and Chief Officers routinely working 70–75 h per week (Caless, 2011) the concept of ‘time’ features heavily within the cultural narratives of police leadership.

The message to those aspiring to and those working within police leadership is less about the exclusionary justifications embedded in the traditional ‘cult of masculinity’ with its emphasis on physicality and more about the need to demonstrate an unstinting commitment to the job by being present and ever-available—something I have referred to as the ‘smart macho culture’ of police leadership (Silvestri, 2003). As a result, ‘extreme/over’ work is reproduced in the everyday expressions of operational policing and is maintained through the normative foundations of police culture upon which rests the ideal officer with an exaggerated sense of mission. The intensification of a management culture characterized by the ability ‘to get things done’ through working long hours and in a ‘full-time’ capacity has become a key feature of organizational life and has come to be an important indicator of one’s commitment and stamina. Again, the gendered implications are obvious, with men more likely to be able to comply with the long hours culture required for most senior jobs (Tomlinson and Durbin, 2010; Silim and Stirling, 2014). In this way, time-serving has become a core constituent of the ‘smart macho’ management culture that characterizes police leadership and is a fundamental resource for building the identity necessary for the police leader (Silvestri, 2003). Turnball and Wass (2015) remind us that given the exaggerated sense of mission that police officers typically display towards their role, it is hardly surprising that officers’ acceptance to do extreme work is expressed in relation to officers’ personal commitment. This temporal dimension further secures men’s identity as different to women and better suited to the ‘ideal’ cultural prescriptions of doing police work. In developing their blueprint for the future of policing in relation to gender, Dick *et al.* (2014) have argued that thinking more creatively about the temporal structures and how and why they are enacted is an

important locus of transformation. They also recommend that the design of police work and the long hours culture should be a key target for future reform because it is this which reproduces some of the dominant ‘myths’ about policing that are embedded in what people do and in their sense of identity as police officers.

## Concluding thoughts

While the academic endeavours cited above have enriched our understanding of police culture immeasurably, there remains a sustained, over simplified, and unflinching attachment to the idea of police culture as monolithic, static, and negative. Through its challenge to the presentation of masculinity in its singular form within policing, i.e. the ‘cult of masculinity’, I hope this article contributes something to the ‘intellectualising’ project of studying gender and police culture. Drawing on a gendered lens to explore the organizational settings within policing, I have suggested a multiplicity of gender representations and performances within policing and encourage those interested in police culture to think in plural terms when considering masculinities, femininities, identities, and culture(s). The ‘cult of masculinity’ with its emphasis on physicality is but one of various cultural prescriptions of what it means to be a police officer in relation to gender. Its cultural manifestations may well feature in the lives of the rank and file but it does not necessarily best capture the cultural dynamics and experience of those holding rank. Here the ‘smart macho’ culture and its expectation of leaders to do and manage time assumes dominance—there are other unwritten cultural expectations: including, the need to demonstrate ‘tough and forceful’ behaviours, symbolized by an aggressive, competitive, and performance-driven leadership style—see Silvestri (2003, 2007) for a fuller discussion.

Indeed the same can be said for women working in leadership and management roles beyond the

police organization. Drawing on interview data with women managers working in IT, finance, and the medical industry, Due Billing (2011, p. 298) critically questions the continued use of the 'male' as the norm when it no longer resonates with many women's experiences, emphasizing that 'variation, complexity and contradictions may be lost when holding onto essentialist understandings such as the male norm'. Allowing for greater complexity then enables a more nuanced and authentic account of gender to emerge—it also ultimately provides reform agendas with a greater chance of success. The police service is clearly committed to improving the representation of women within policing and diversity discourses certainly present as enabling, progressive, and inclusive. This reading belies a somewhat alternative reality. Alongside a rather stubborn focus on increasing the number of women into policing, police diversity discourse suggests that women may bring with them 'alternative' and 'better' policing. Organizational proponents of critical mass certainly suggest this as a positive way forward, as Holgersson (2013, p. 463) notes 'homosocial circuits can be challenged if persons that deviate from the norm are included'. The significant level of police reform in relation to the reconfiguring the police career in recent years (through enabling direct entry and flexible working practice) is also being hailed as evidence of a commitment to developing diversity within policing. My argument is a simple one—tackling the gendered nature of police culture requires a much more complex appreciation of the ways in which gender is routinely accomplished within policing. In this article, I have argued that entrenched attitudes and an unwavering attachment to a 'crime fighting' mentality together with a police career model that emphasizes time through 'extreme/over' work are but two resources which enable difference to be constructed between men and women and sites in which credibility, competence, and commitment are defined and redefined in ways that women become defined as 'unsuitable' and 'deficient' to the work of policing.

Recruiting more women into the police service without fundamentally rethinking or altering the foundations or the 'substructure' (Acker, 1992) within which they undertake their work does not bode well for long-term organizational change. The police service may be well on its way to becoming a more inclusive, enabling and progressive organization through its commitment to diversity but it needs to be mindful of the simultaneous undoing of such progress at a cultural level. Loftus (2008) has documented the considerable resistance and resentment held by white, heterosexual male officers towards the institutionalization of diversity within the policing. Here we are left with a situation in which equalities and diversities discourse is perceived by the majority to be political correctness gone too far. That said, Loftus (2009) maintains the powerful impact of the 'diversity agenda' and 'identity politics' on the cultural realm of policing, noting the significant 'interruption' caused by the arrival of 'new *politics of policing diversity*' (Loftus, 2009, p. 35, italics original). Thinking ahead, there is much scope for police research to further consider the complexity within 'identity politics' and to map out the various 'inequality regimes' (Acker, 2009) that intersect with one another. In this way, analysis on exclusion might begin to integrate and incorporate gender with other forms of persistent inequalities prevalent within policing, including those based on race/ethnicity, sexuality and class (Rowe, 2007; Holdaway, 2013; Jones, 2014). With an increased pluralization of policing and prediction of further growth in the police family and policing roles, Atkinson (2016, p. 13) calls for a 'broadening of the cultural vista' when exploring police culture(s). There remains considerable scope for further conceptual development in relation to police culture and gender. Such work will serve as an important check on the ways in which gender symbols, patterns and beliefs about 'real' police work and 'ideal' workers are being redrawn and repositioned across an increasingly complex policing landscape.

## References

- Acker, J. (1990). 'Hierarchies, Jobs, Bodies: A Theory of Gendered Organisations.' *Gender and Society* 4(2): 139–158.
- Acker, J. (1992). Gendering Organisational Theory. In Mills, A. and Tancred, P. (eds), *Gendering Organisational Analysis*. London: Sage.
- Acker, J. (2009). 'From glass ceiling to inequality regimes.' *Sociology of Work* 51: 199–217.
- Ainsworth, S., Batty, A. and Burchielli, R. (2014). 'Women Constructing Masculinity in Voluntary Firefighting.' *Gender, Work and Organization* 21(1): 37–56.
- Atkinson, C. (2016). 'Patriarchy, Gender, Infantilisation: A Cultural Account of Police Intelligence Work in Scotland.' *Australian & New Zealand Journal of Criminology* 1–18. <http://journals.sagepub.com/doi/abs/10.1177/0004865815626964>.
- Bacon, M. (2014). Police Culture and the New Policing Context. In Brown, J. (ed.), *The Future of Policing*. London: Routledge.
- Banton, M. (1964). *The Policeman in the Community*. London: Tavistock.
- Barrie, D. G. and Broomhall, S. (eds) (2012). *A History of Police and Masculinities, 1700-2010*. London: Routledge.
- BAWP (2014). 'Gender Agenda 3.' <http://www.bawp.org/Resources/Documents/BAWP%20Gender%20Agenda%203%20final%20%2016-oct-2014.pdf>.
- Brown, J. (1997). 'European Policewomen: A Comparative Research Perspective.' *International Journal of the Sociology of Law* 25: 1–19.
- Brown, J., and Heidensohn, F. (2000). *Gender and Policing*. London: Macmillan.
- Caless, B. (2011). *Policing at the Top*. Bristol: Policy Press.
- Chan, J. (1997). *Changing Police Culture: Policing in a Multicultural Society*. Cambridge: Cambridge University Press.
- Childs, S. and Krook, M. L. (2008). 'Critical Mass Theory and Women's Political Representation.' *Political Studies* 56: 725–736.
- Cockcroft, T. (2012). *Police Culture: Themes and Concepts*. Abingdon: Routledge.
- Cockcroft, T. (2014). 'Police Culture and Transformational Leadership: Outlining the Contours of a Troubled Relationship.' *Policing: A Journal of Policy and Practice* 8(1): 5–13.
- Cain, M. (1973). *Society and the Policeman's Role*. London: Routledge.
- Connell, R. (1987). *Gender and Power: Society, the Person and Sexual Politics*. Stanford, CA: Stanford University Press.
- Connell, R. (2006). 'Glass Ceilings or Gendered Institutions? Mapping the Gender Regimes of Public Sector Worksites.' *Public Administration Review* 66(6): 837–849.
- Dick, P., Silvestri, M. and Westmarland, L. (2014). Women Police: Potential and Possibilities for Police Reform. In Brown, J. (ed.), *The Future of Policing*. London: Routledge.
- Donaldson-Feilder, E. and Tharani, T. (2011). *Police Superintendents' Association of England and Wales Personal Resilience Questionnaire Survey 2011 Summary Report on Results*. London: Affinity at Work.
- Due Billing, Y. (2011). 'Are Women in Management Victims of the Phantom of the Male Norm?' *Gender, Work and Organization* 18(3): 298–317.
- Fielding, N. (1994). Cop Canteen Culture. In Newburn, T. and Stanko, E. (eds), *Just Boys Doing Business*. Oxon: Routledge.
- Hale, H. (2011). 'The Role of Practice in the Development of Military Masculinities.' *Gender, Work and Organization* 19(6): 699–722.
- Heidensohn, F. (1992). *Women in Control? The Role of Women in Law Enforcement*. Oxford: Clarendon Press.
- Heidensohn, F. (1994). 'From Being to Knowing: Some Reflections on the Study of Gender in Contemporary Society.' *Women and Criminal Justice* 6(1): 13–37.
- Hobbs, D. (1998). *Doing the Business: Entrepreneurship, the Working Class and Detectives in the East End of London*. Oxford University Press.
- Holdaway, S. (2013). 'Police Race Relations in the Big Society: Continuity and Change.' *Policing and Society* 13(2): 215–230.
- Holgersson, C. (2013). 'Recruiting Managing Directors: Doing Homosexuality.' *Gender, Work and Organization* 20(4): 454–466.
- Jackson, L. (2006). *Women Police: Gender, Welfare and Surveillance in the Twentieth Century*. Manchester: Manchester University Press.
- Johnston, M. and Hodge, E. (2014). 'Dirt, Death and Danger? I Don't Recall Any Adverse Reaction: Masculinity and the Taint Management of Hospital Private Security Work'. *Gender, Work and Organization* 21(6): 546–558.
- Jones, M. (2014). A Diversity Stone Left Unturned? Exploring the Occupational Complexities Surrounding Lesbian, Gay and Bisexual Police Officers. In Brown, J. (ed.), *The Future of Policing*. London: Routledge.
- Loader, I. (2014). Why do the Police Matter? Beyond the Myth of Crime-Fighting. In Brown, J. (ed.), *The Future of Policing*. London: Routledge.
- Loftus, B. (2008). 'Dominant Culture Interrupted: Recognition, Resentment and the Politics of Change in an English Police Force.' *British Journal of Criminology* 48(6): 778–797.
- Loftus, B. (2009). *Police Culture in a Changing World*. Oxford: Oxford University Press.
- Loftus, B. (2010). 'Police Occupational Culture: Classic Themes, Altered Times.' *Policing and Society* 20(1): 1–20.

- Manning, P. (1978). The Police: Mandate, Strategies and Appearances. In Manning, P. K. and Van Maanen, J. (eds), *Policing: A View From the Street*. Santa Monica, CA: Goodyear.
- McCarthy, D. (2012). 'Gendering "Soft" Policing: Multi-Agency Working, Female Cops, and the Fluidities of Police Culture/s.' *Policing and Society* 23(2): 261–278.
- Morash, M. and Haarr, R. H. (2012). 'Doing, Redoing, and Undoing Gender: Variation in Gender Identities of Women Working as Police Officers.' *Feminist Criminology* 7(1): 3–23.
- Natarajan, M. (2008). *Women Police in a Changing Society*. Aldershot: Ashgate.
- Ness, K. (2012). 'Constructing Masculinity in the Building Trades: 'Most Jobs in the Construction Industry Can Be Done by Women.' *Gender, Work and Organization* 19(6): 555–766.
- Paoline, E. A. (2003). 'Taking Stock: Towards a Richer Understanding of Police Culture.' *Journal of Criminal Justice* 31(3): 199–214.
- Paoline, E. A. and Terrill, W. (2013). *Police Culture: Adapting to the Strains of the Job*. Durham, NC: Carolina Academic Press.
- Prenzler, T. and Sinclair, G. (2013). 'The Status of Women Police Officers: An International Review.' *International Journal of Law, Crime and Justice* 41(2): 115–131.
- Punch, M. (1985). *Conduct Unbecoming: The Social Construction of Police Deviance and Control*. London: Tavistock Publications.
- Rabe-Hemp, C. (2009). 'POLICEwomen or PoliceWOMEN? Doing Gender and Police Work.' *Feminist Criminology* 4: 114–129.
- Reiner, R. (1991). *Chief Constables*. Oxford: Oxford University Press.
- Reiner, R. (1992). *The Politics of the Police*, 2nd edn. London: Harvester Wheatsheaf.
- Reuss-Ianni, E. and Ianni, F. (1983). Street Cops and Management Cops: The Two Cultures of Policing. In Punch, M. (ed.), *Control in the Police Organization*. Cambridge, MA: MIT Press.
- Rowe, M. (2007). *Policing Beyond MacPherson: issues in Policing, Race & Society*. Cullompton: Willan Publishing.
- Schulz, D. (1995). *From Social Worker to Crimefighter: Women in United States Municipal Policing*. Westport, CT: Praeger Publishers.
- Segrave, K. (1995). *Policewomen: A History*. Jefferson, NC: McFarland.
- Silvestri, M. (2003). *Women in Charge: Policing, Gender and Leadership*. Cullompton, Devon: Willan Publishing.
- Silvestri, M. (2006). 'Doing Time: Becoming A Police Leader.' *International Journal of Police Science and Management* 8(4): 266–281.
- Silvestri, M. (2007). 'Doing Police Leadership: Enter the "New Smart Macho' *Policing and Society* 17(1): 38–58.
- Silvestri, M. (2015). "'Gender Diversity: A Hop, Skip and a Jump Forwards and Back" in Special Issue on Police Diversity.' *Policing: A Journal of Policy & Practice* 9(1): 56–64.
- Silvestri, M., Tong, S. and Brown, J. (2013). 'Gender and Police Leadership: Time for a Paradigm Shift?' *International Journal of Police Science & Management* 15(1): 61–73.
- Sklansky, D. A. (2007). Seeing Blue: Police Reform, Occupational Culture, and Cognitive Burn-N. In O'Neill, M., Marks, M. and Singh, A. (eds), *Police Occupational Culture: New Debates and Directions*. New York: Elsevier.
- Skolnick, J. H. (1966). *Justice without Trial: Law Enforcement in Democratic Society*. New York: Wiley.
- Silim, A. and Stirling, A. (2014). *Women and Flexible Working: Improving Female Employment Outcomes in Europe*. London: Institute for Public Policy Research.
- Terpstra, J. and Schapp, D. (2013). 'Police Culture, Stress Conditions and Working Styles.' *European Journal of Criminology* 10(1): 59–73.
- Tomlinson, J. and Durbin, S. (2010). 'Female Part-Time Managers: Work-Life Balance, Aspirations and Career Mobility.' *Equality, Diversity and Inclusion: An International Journal* 29(3): 255–270.
- Turnball, P. and Wass, V. (2015). 'Normalizing Extreme Work in the Police Service? Austerity and the Inspecting Ranks.' *Organization* 22(516): 512–529.
- Van Ewijk, A. R. (2012). 'Diversity within Police Forces in Europe: A Case for the Comprehensive View.' *Policing: A Journal of Policy and Practice* 6: 76–92.
- Waddington, P. A. J. (1999). *Policing Citizens*. London: UCL Press.
- West, C. and Fenstermaker, S. (1995). 'Doing Difference.' *Gender & Society* 9(1): 8–37.
- West, C. and Zimmerman, D. H. (1987). 'Doing Gender.' *Gender and Society* 1(2): 125–151.
- Westley, W. A. (1970). *Violence and the Police. A Sociological Study of Law, Custom and Morality*. Cambridge, MA: MIT Press.
- Westmarland, L. (2001). *Gender and Policing: Sex, Power and Police Culture*. Cullompton: Willan Publishing.
- Young, M. (1991). *An Inside Job*. Oxford: Clarendon Press.
